# Supplementary material for: Tuning of electronic transport characteristics of ZnO micro/nanowire piezotronic Schottky diodes by bending: threshold voltage shift
Source: Royal Society of Chemistry journal article supplement (doi:10.1039/c0cp00803f), 2010-01-01
Supplement: c0cp00803f.pdf [file c0cp00803f.pdf]

**Supporting Information for**  
**Tuning of Electronic Transport Characteristics of ZnO**  
**Micro/Nanowire Piezotronic Schottky Diodes by Bending:**  
**Threshold Voltage Shift**

Wen Guo,<sup>a</sup> Ya Yang,<sup>a</sup> Jing Liu,<sup>b</sup> and Yue Zhang\*<sup>a</sup>

**Figure S1** The  $I$ - $V$  characteristics of the fabricated devices under the dark and the UV light illumination. The loading forces on the straight and bent ZnO wires are 5 nN and 160 nN. The inset shows the schematic diagram of the UV light illumination on the ZnO wire.

**Figure S2** Fitting the plots of  $\ln I$  vs  $V$  of the bent ZnO wire under the dark and the UV light illumination. The solid curves are accomplished by fitting the experimental data points.

**Figure S3** The  $I$ - $V$  curves of the fabricated device based on a single ZnO wire with the diameter of 1.8  $\mu\text{m}$  under the loading forces of 5 nN and 160 nN. The inset is a SEM of the single ZnO wire.

**Figure S4** The  $I$ - $V$  curves of the fabricated device based on a single ZnO wire with the diameter of 2.3  $\mu\text{m}$  under the loading forces of 5 nN and 160 nN. The inset is a SEM of the single ZnO wire.

**Figure S5** The  $I$ - $V$  curves of the fabricated device based on a single ZnO wire with the diameter of 2.7  $\mu\text{m}$  under the loading forces of 5 nN and 160 nN. The inset is a SEM of the single ZnO wire.

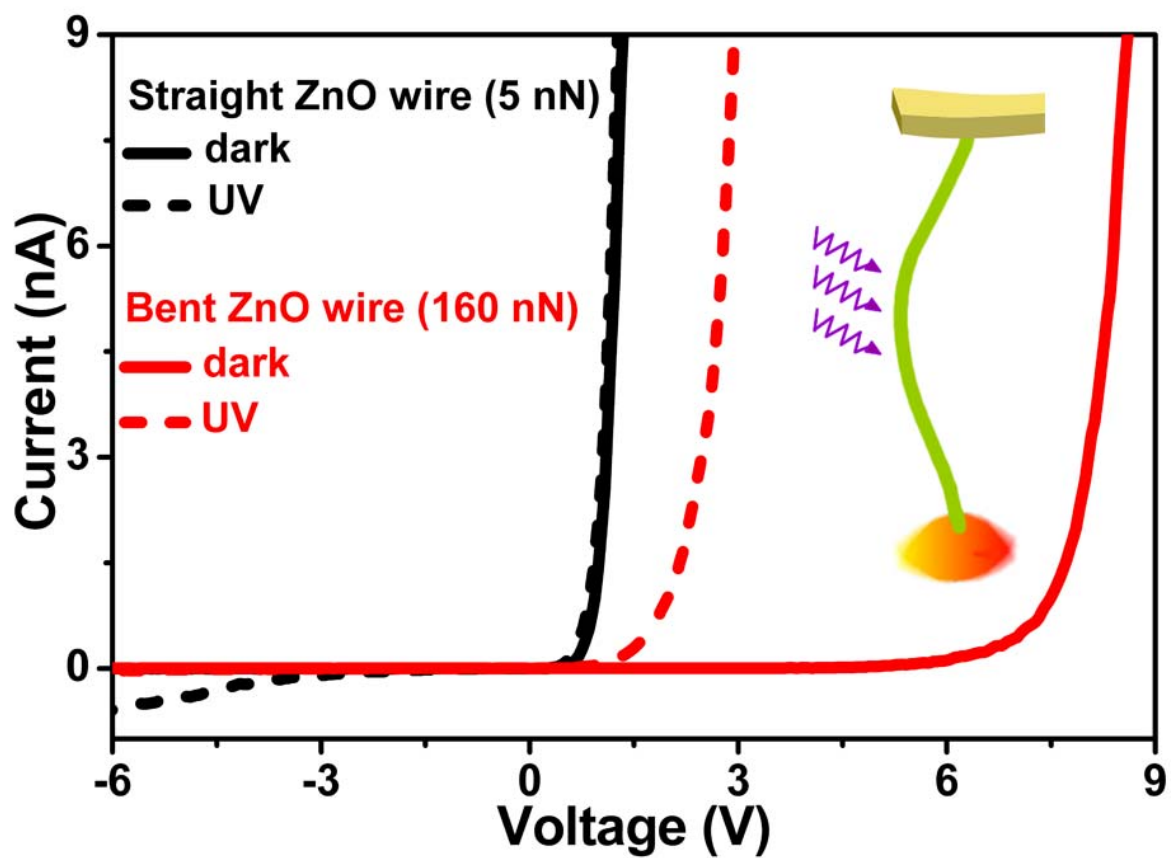

Figure S1

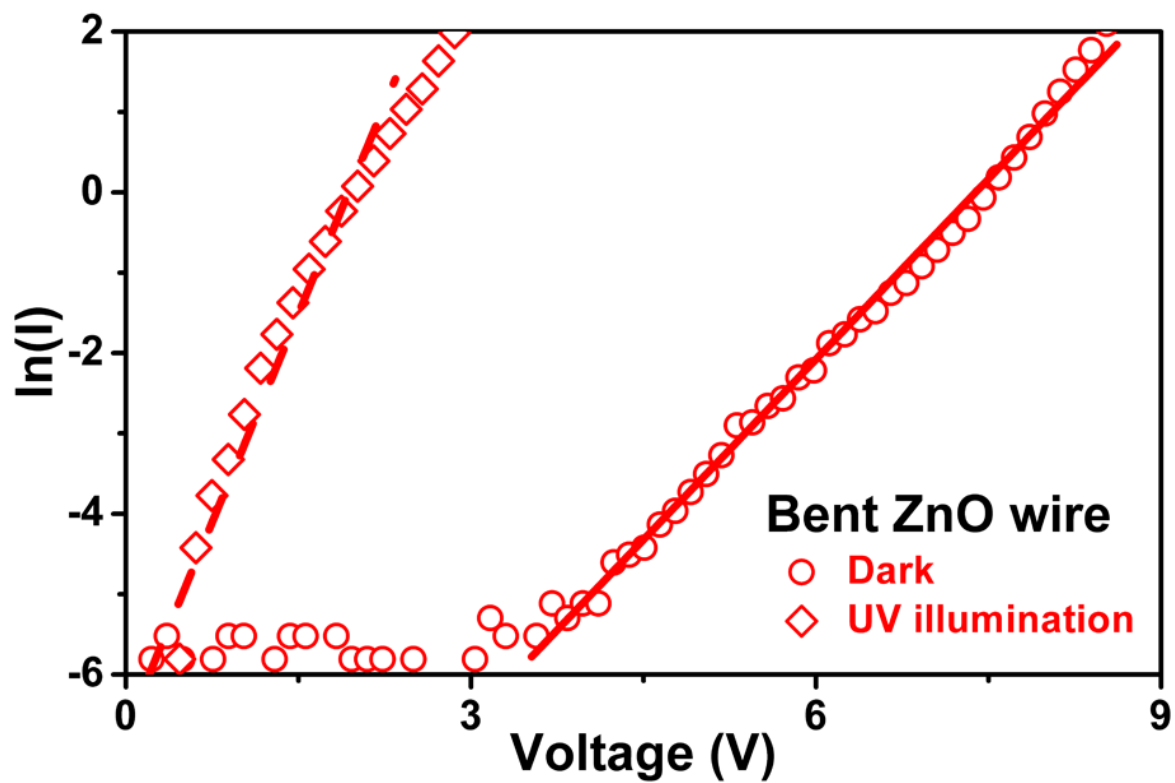

Figure S2

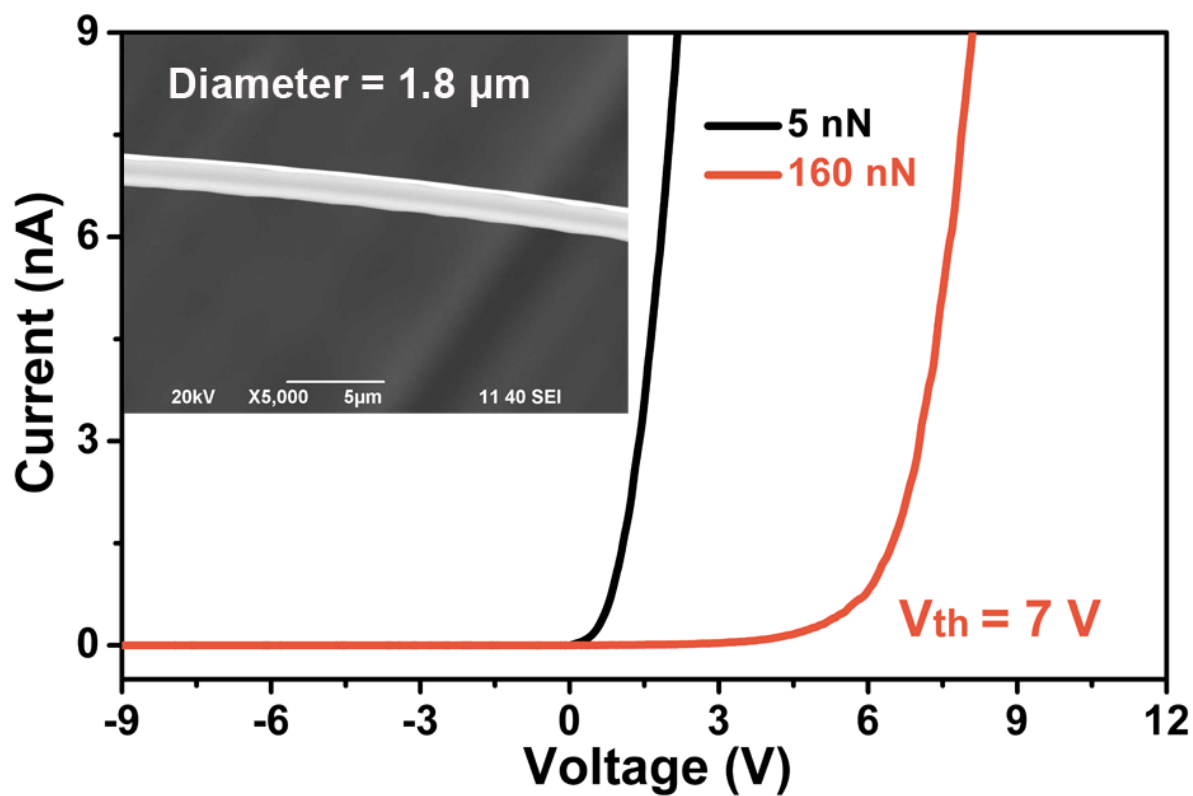

Figure S3

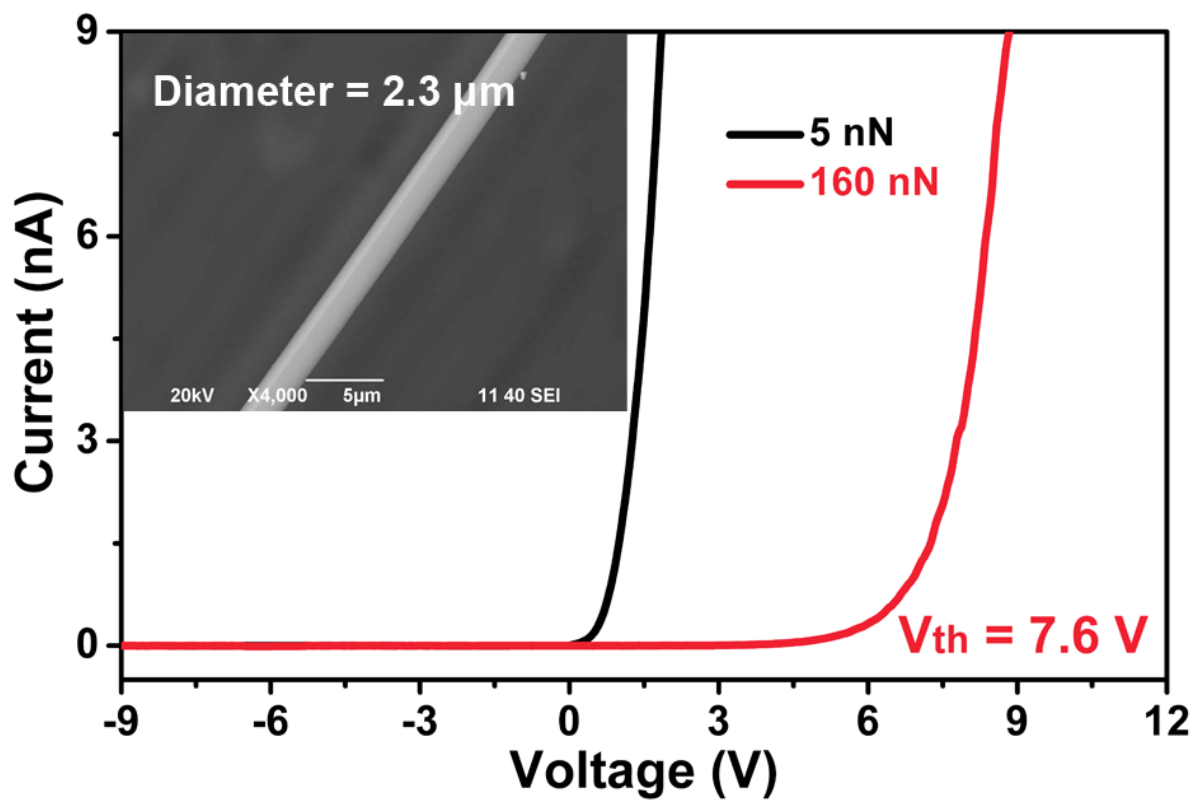

Figure S4

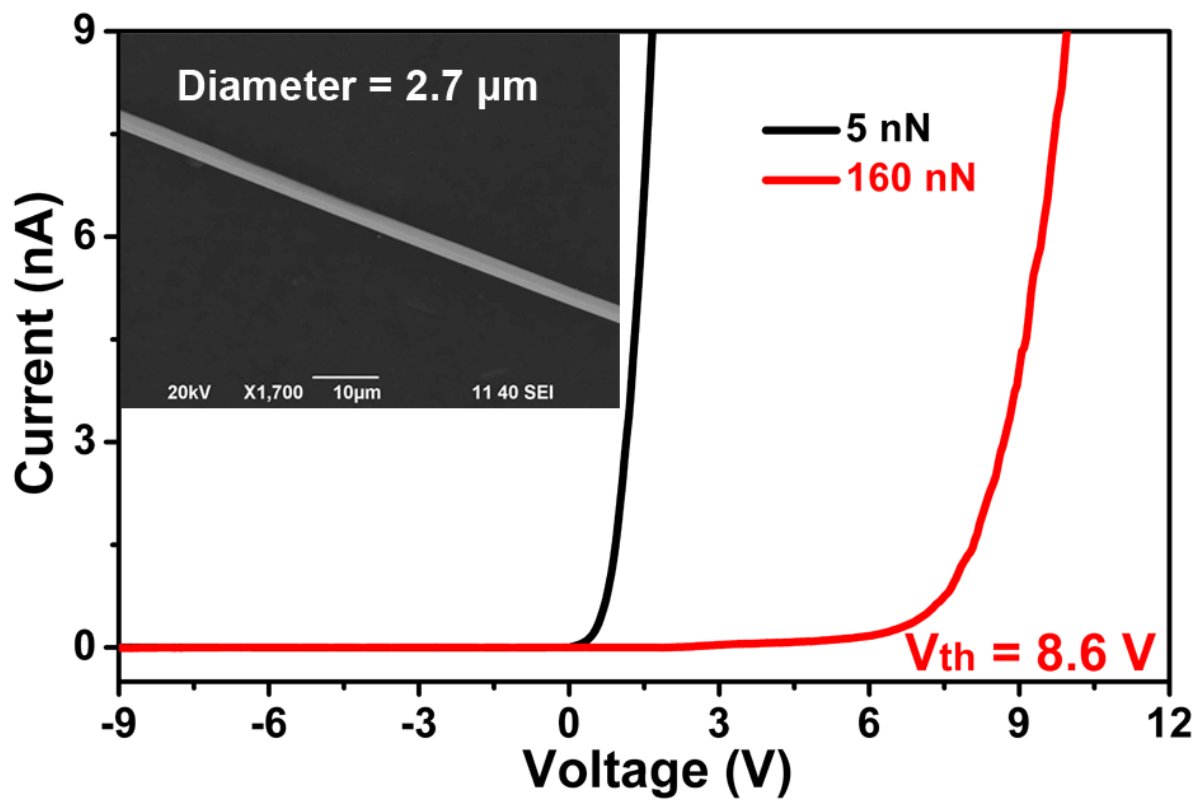

Figure S5
